# Supplementary material
Source: Royal Society of Chemistry journal article supplement (doi:10.1039/d5lf00405e)
Supplement: d5lf00405e1.pdf [file d5lf00405e1.pdf]

1 **SUPPLEMENTARY DATA**

2 **Solar light driven Type II heterojunction TiO<sub>2</sub>@ZIF-8 nanocomposite for**  
3 **sustainable chlorpyrifos detoxification: physicochemical insights,**  
4 **mineralization pathways and antibacterial performance**

5 Subhashree Mohanty, Bibeka nanda Marai, Sushanta Kumar Badamali\*

6 *Department of Chemistry, Utkal University, Vani Vihar, Bhubaneswar-751004, Odisha, India*

7 \*Corresponding author E-mail: skbuche@utkaluniversity.ac.in

8 ORCID no: 0000-0003-0526-0146

9 **S1**

10 **Table S1** The constraint for model optimization for the CP removal by TiO<sub>2</sub>@ZIF-8

| Name                   | Goal        | Lower limit | Upper Limit | Lower weight | Upper weight | Importance |
|------------------------|-------------|-------------|-------------|--------------|--------------|------------|
| A:Concentration        | Is in range | 50          | 200         | 1            | 1            | 3          |
| B:Adsorbent dose       | Is in range | 10          | 50          | 1            | 1            | 3          |
| C: Time                | Is in range | 15          | 120         | 1            | 1            | 3          |
| Degradation efficiency | none        | 80.8        | 90.01       | 1            | 1            | 3          |

11

12

13

14

15

16

17

18  
19  
20 S2

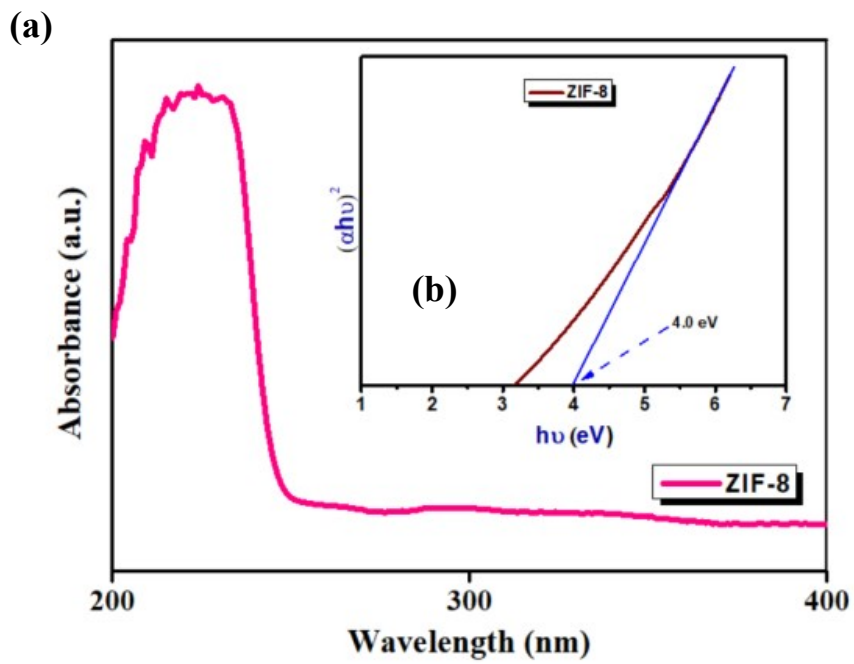

(b)

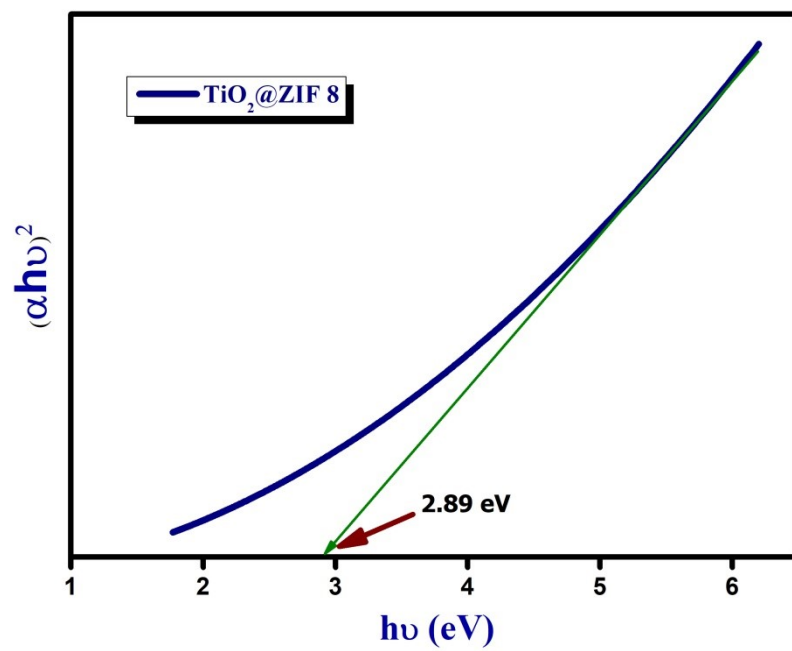

47

48

49

(c)

50

51

52

53

54

55

56

57

58

59

60

61

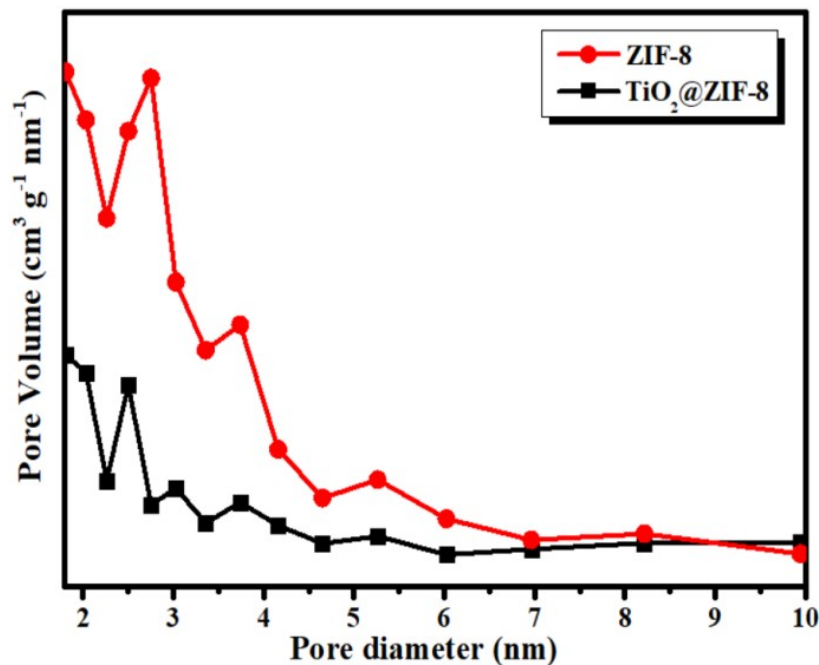

62 **Figure S2** DR UV spectra and band gap of ZIF-8 (b) band gap of TiO<sub>2</sub>@ZIF-8 (c) pore size  
63 distribution curve of ZIF-8 and TiO<sub>2</sub>@ZIF-8

64

65 **Table S3** Fit summary

66 **Response 1: Degradation activity**

| Source           | Sequential p-value | Lack of Fit p-value | Adjusted R <sup>2</sup> | Predicted R <sup>2</sup> |                  |
|------------------|--------------------|---------------------|-------------------------|--------------------------|------------------|
| Linear           | 0.0002             | < 0.0001            | 0.6834                  | 0.4329                   |                  |
| 2FI              | 0.1128             | < 0.0001            | 0.7608                  | -0.2378                  |                  |
| <b>Quadratic</b> | <b>&lt; 0.0001</b> | <b>0.3850</b>       | <b>1.0000</b>           | <b>0.9998</b>            | <b>Suggested</b> |
| Cubic            | 0.3850             |                     | 1.0000                  |                          | <b>Aliased</b>   |

67

68

69

70

71

72

73 **Table S4** ANOVA for Quadratic model74 **Response 1: Degradation activity of CP by TiO<sub>2</sub>@ZIF-8**

| Source           | Sum of Squares | df | Mean Square | F-value   | p-value                |
|------------------|----------------|----|-------------|-----------|------------------------|
| <b>Model</b>     | 105.95         | 9  | 11.77       | 1.181E+05 | < 0.0001 significant   |
| A-Concentration  | 10.75          | 1  | 10.75       | 1.079E+05 | < 0.0001               |
| B-Adsorbent dose | 0.3041         | 1  | 0.3041      | 3051.52   | < 0.0001               |
| C-Time           | 39.77          | 1  | 39.77       | 3.990E+05 | < 0.0001               |
| AB               | 0.6050         | 1  | 0.6050      | 6070.51   | < 0.0001               |
| AC               | 9.52           | 1  | 9.52        | 95567.36  | < 0.0001               |
| BC               | 0.6844         | 1  | 0.6844      | 6867.70   | < 0.0001               |
| A <sup>2</sup>   | 0.2785         | 1  | 0.2785      | 2794.20   | < 0.0001               |
| B <sup>2</sup>   | 2.80           | 1  | 2.80        | 28083.65  | < 0.0001               |
| C <sup>2</sup>   | 1.90           | 1  | 1.90        | 19044.50  | < 0.0001               |
| <b>Residual</b>  | 0.0008         | 8  | 0.0001      |           |                        |
| Lack of Fit      | 0.0002         | 2  | 0.0001      | 1.12      | 0.3850 not significant |
| Pure Error       | 0.0006         | 6  | 0.0001      |           |                        |
| <b>Cor Total</b> | 105.95         | 17 |             |           |                        |

75

76 S5

77

78

79

80

81

82

83

84

85

86

87

88

89

90

91

92

93

94

95

96

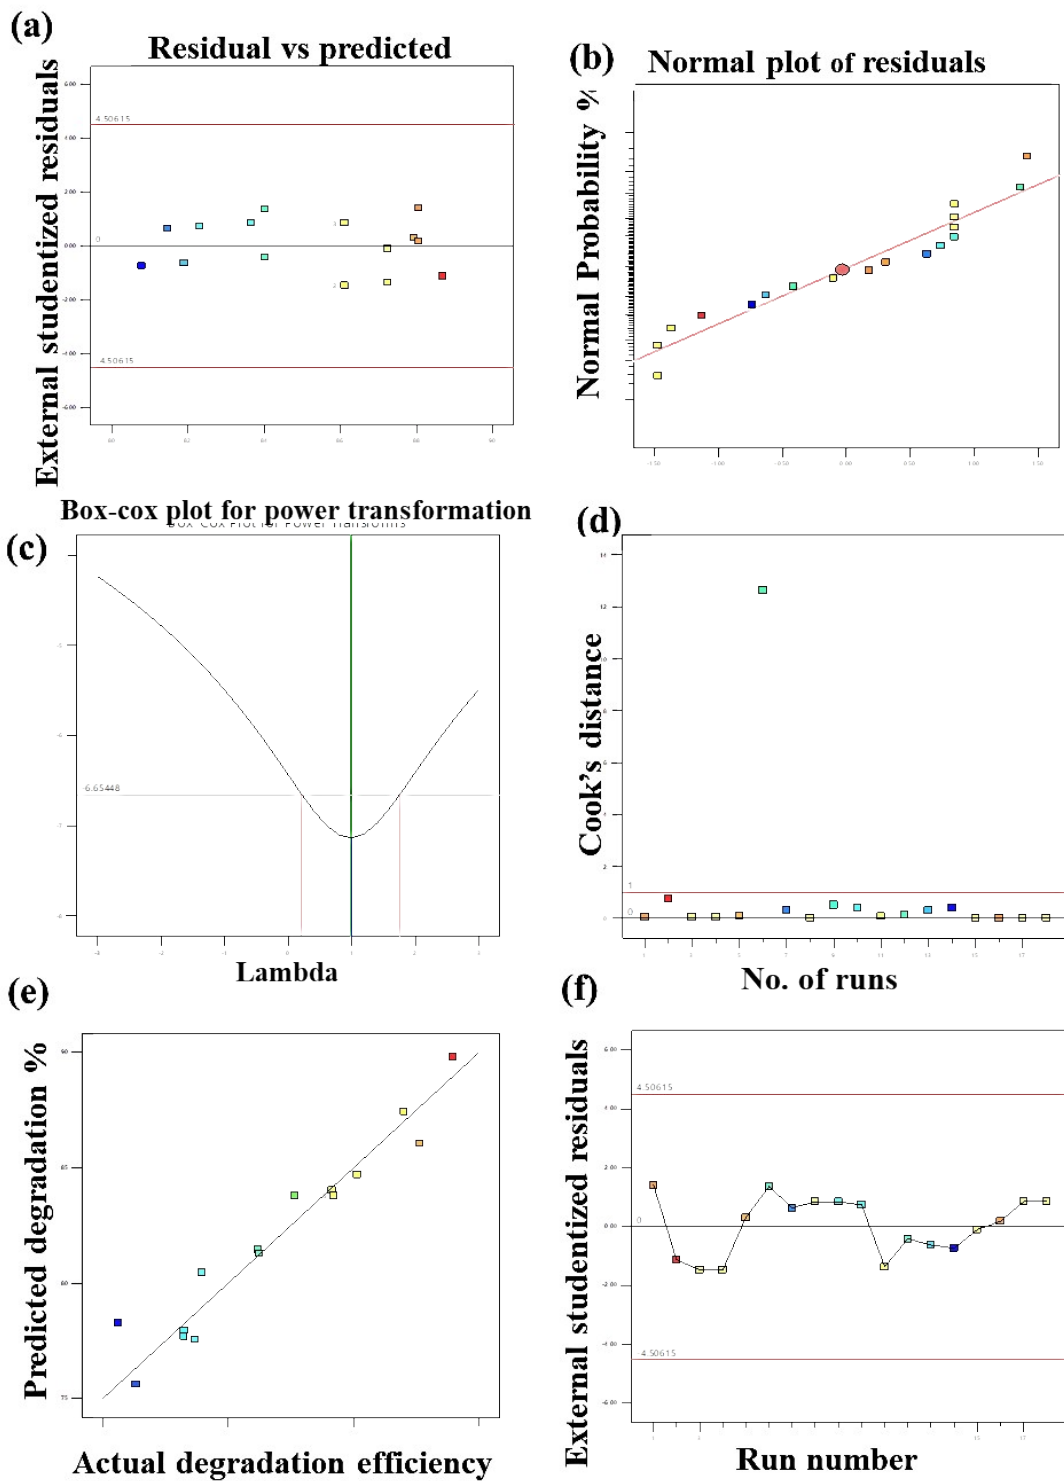

97 **Figure S5** (a) externally studentized residuals versus predicted degradation efficiency, (b)  
98 Normal plot of residuals, (c) Box-Cox plot (d) Cook's distance (e) predicted versus actual  
99 degradation efficiency, and (f) externally studentized residuals versus run number

100

101

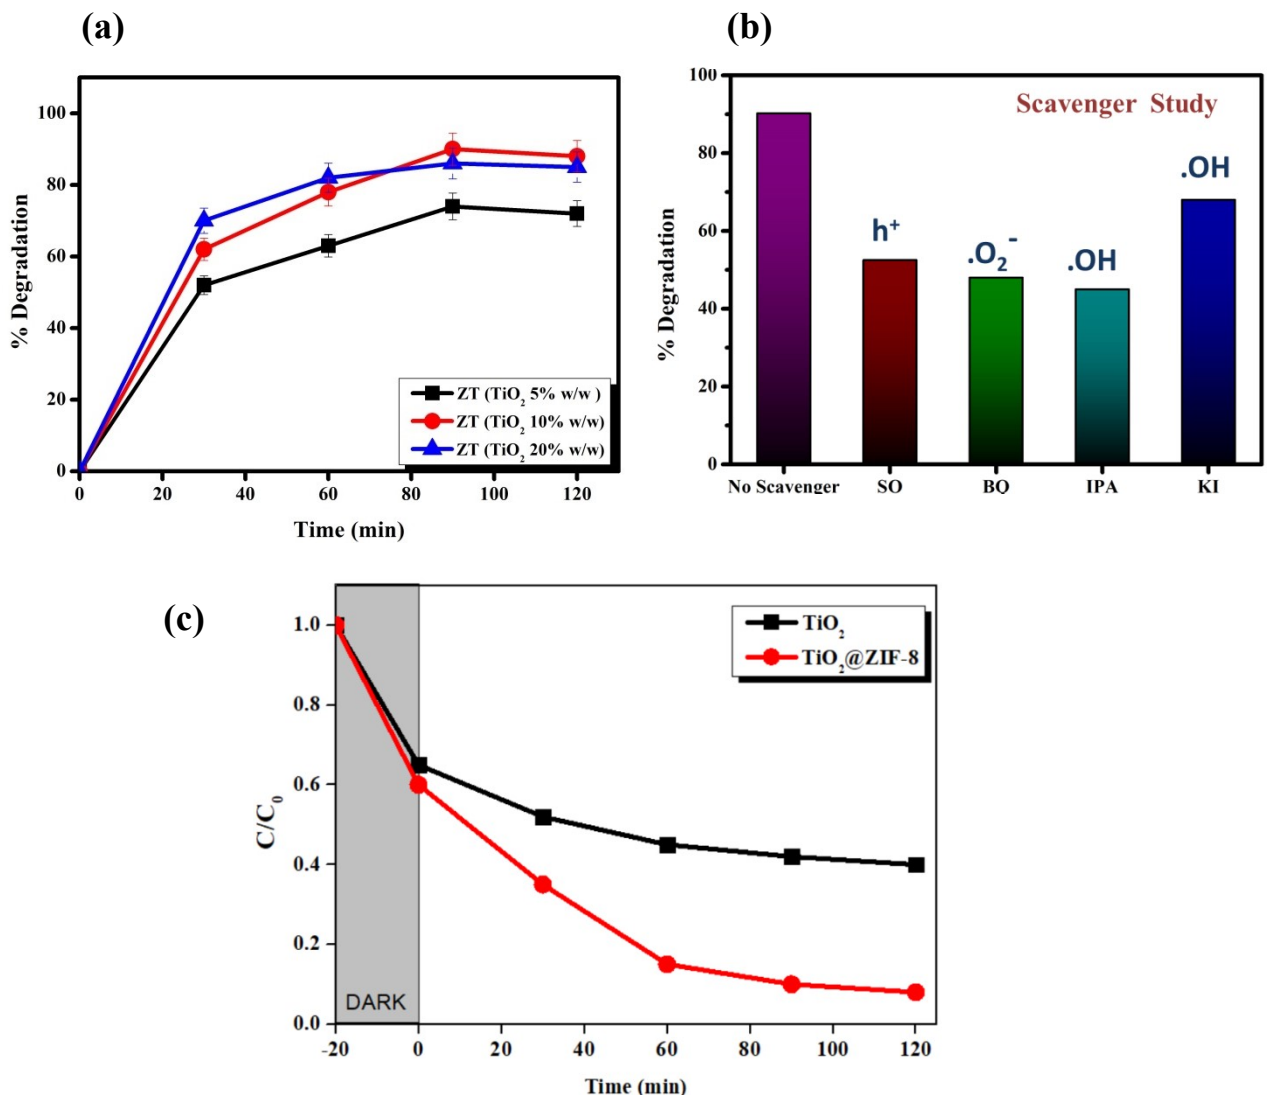

103  
104

105

106

107

108

109

110

111

112 **Figure S6** (a) Photocatalytic degradation of chlorpyrifos by TiO<sub>2</sub>@ZIF-8 (ZT)(ZIF-8:TiO<sub>2</sub>  
 113 (5, 10, 20 % w/w) (b) scavenger study (TiO<sub>2</sub>@ZIF-8; 30 mg, CP concentration;100 mg L<sup>-1</sup>,  
 114 Time; 120 min) (c) Photocatalytic activity by TiO<sub>2</sub> and TiO<sub>2</sub>@ZIF-8

115

116

117

118

119

120

121

122 S7

123 Table S7 Rate constant with different concentration of CP

| Sl. No. | CP conc. (mg L <sup>-1</sup> ) | TiO <sub>2</sub> @ZIF-8 (gL <sup>-1</sup> ) | Rate constant (k, sec <sup>-1</sup> ) | R <sup>2</sup> |
|---------|--------------------------------|---------------------------------------------|---------------------------------------|----------------|
| 1       | 50                             | 0.6                                         | 0.02813                               | 0.971          |
| 2       | 100                            | 0.6                                         | 0.02565                               | 0.991          |
| 3       | 200                            | 0.6                                         | 0.02682                               | 0.982          |
| 4       | 250                            | 0.6                                         | 0.02759                               | 0.984          |

130

131 S8

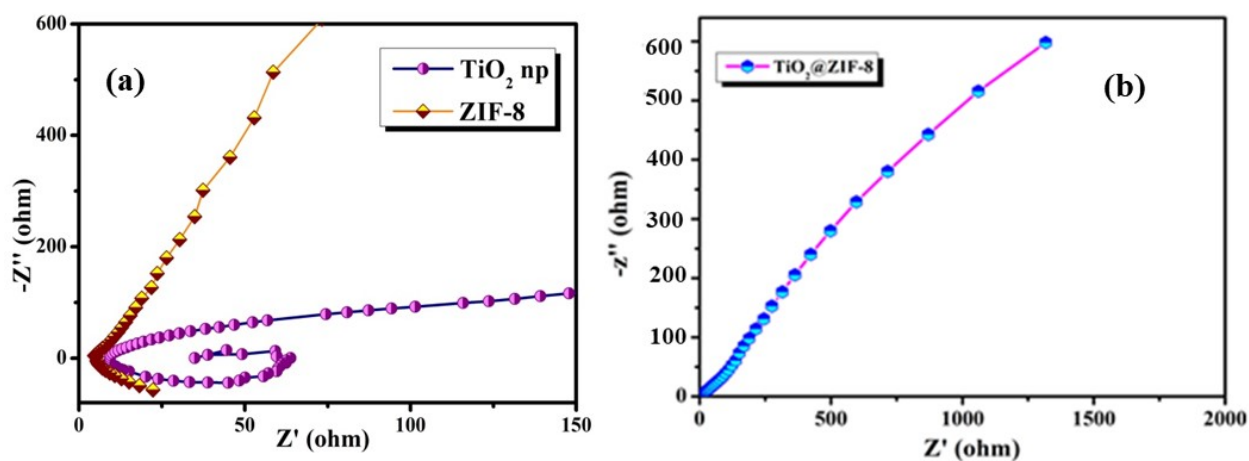

132

133 Figure S8 EIS Nyquist plot of (a) ZIF-8 and TiO<sub>2</sub> np (b) TiO<sub>2</sub>@ZIF-8

134

135

136

137

138

139

140

141

142 S9

143

144

145

146

147

148

149

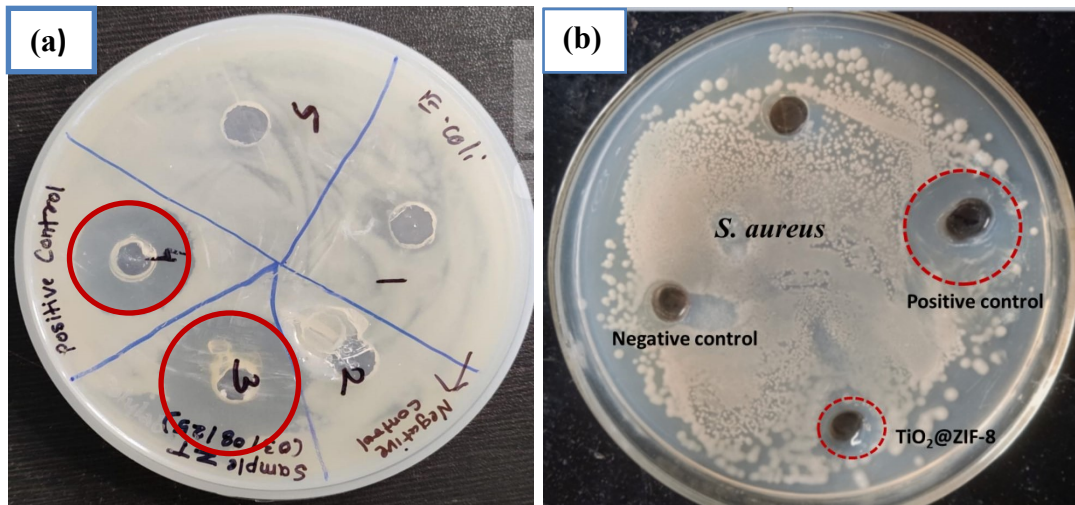

150 **Figure S9** Antibacterial activity of TiO<sub>2</sub>@ZIF-8 and ZIF-8 against (a) *E. Coli* and (b) *S.*

151 *Aureus*

152

153
